# Supplementary material
Source: PubMed Central journal article supplement (PMC6156620)
Supplement: pnas.1714499115.sapp.pdf [file pnas.1714499115.sapp.pdf]

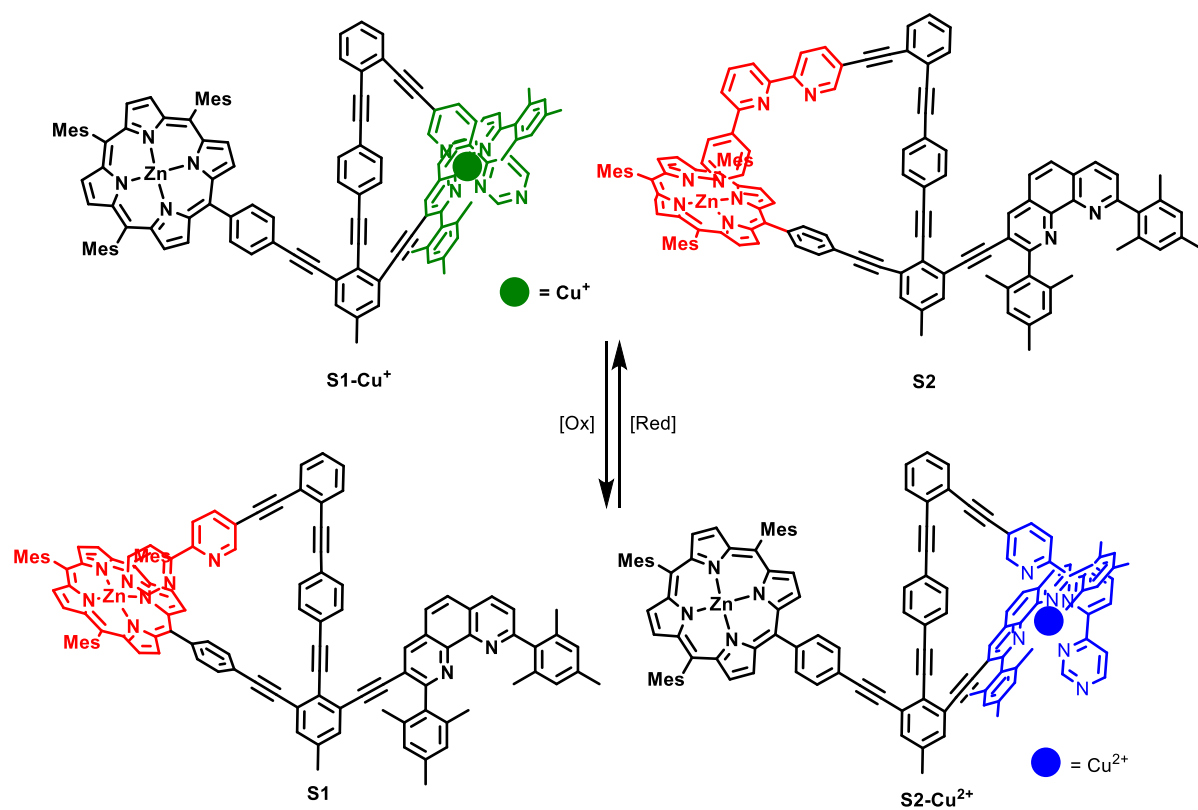

**Figure S1:** Schematic representation of the signaling cascade by two redox-regulated nano switches.

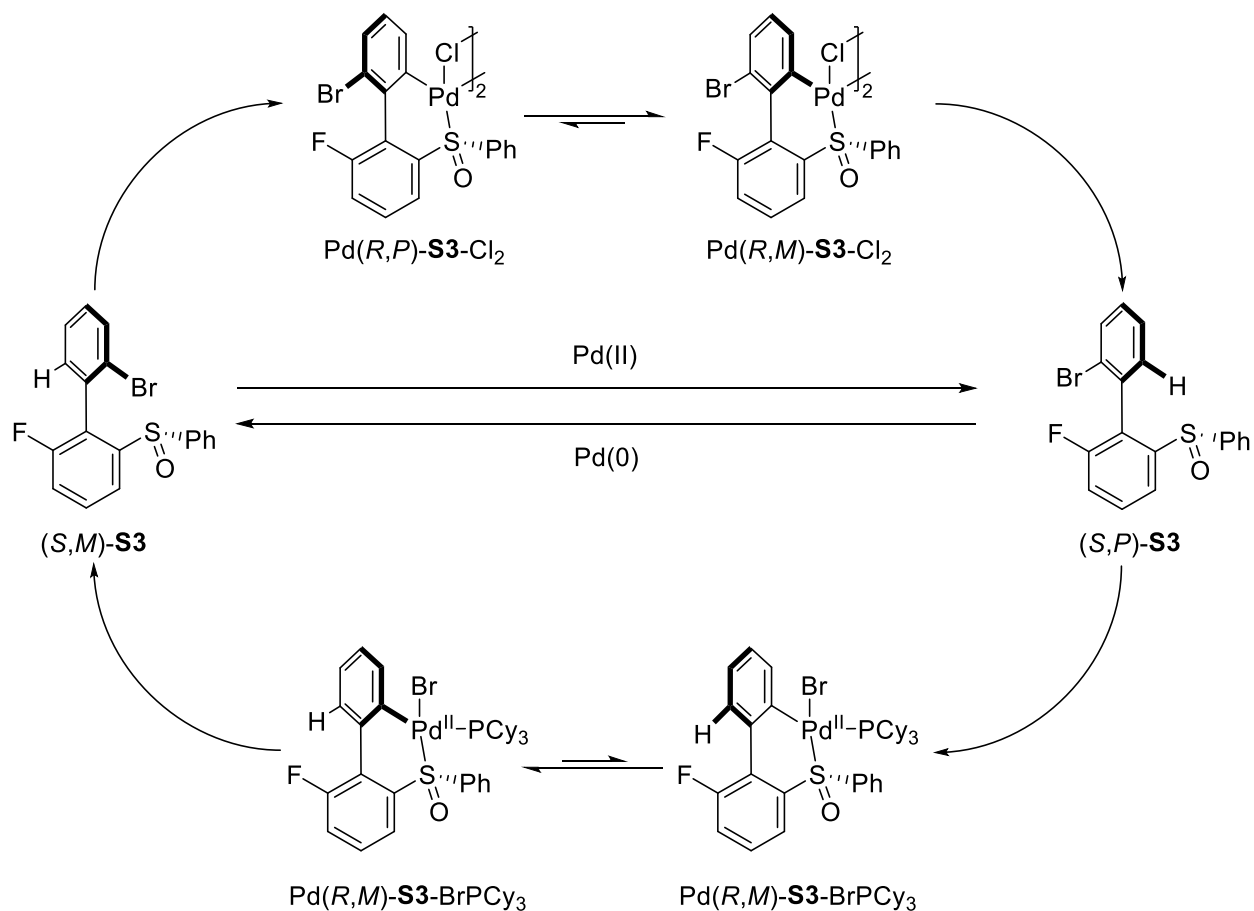

**Figure S2:** Sequential operation of a Pd-fueled molecular motor. Conditions: (i)  $\text{Pd}(\text{OAc})_2$  (1.5 eq.) and TFA (2.0 eq.) in 1,2-dichloroethane (1,2-DCE) at 80 °C for 22 hours, followed by ligand exchange with LiCl (20 eq.) in acetone for 4 hours at room temperature to afford  $\text{Pd}(R,M)\text{-S3-Cl}_2$ . (ii) *trans,trans*-Dibenzylideneacetone (dba, 2.0 eq.) in 1,2-DCE for 15 minutes followed by sodium triacetoxyborohydride ( $\text{NaBH}(\text{OAc})_3$ , 3.0 eq.) for an additional 20 minutes at room temperature affords  $(S,P)\text{-S3}$ . (iii)  $\text{Pd}_2(\text{dba})_3$  (0.75 eq.) and tricyclohexylphosphine ( $\text{PCy}_3$ , 2.0 eq.) in THF for 22 hours at 40 °C affords  $\text{Pd}(R,M)\text{-S3-BrPCy}_3$ . (iv) *N*-Bromosuccinamide (NBS, 4.0 eq.) in DCM at room temperature for 22 hours affords  $(S,M)\text{-S3}$ .

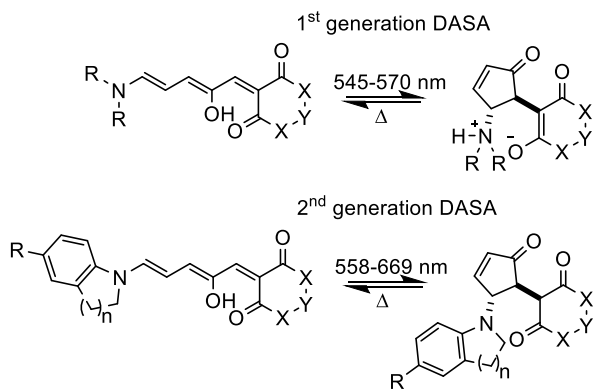

**Figure S3:** Generalized structures of DASAs with amine (first generation) or aniline (second generation) donors and Meldrum's ( $X = O$  and  $Y = C(CH_3)_2$ ) or barbituric ( $X = NMe$  and  $Y = CO$ ) acid-based acceptors.
